# Supplementary material for: Nanocrystalline Pt-CeO2as an efficient catalyst for a room temperature selective reduction of nitroarenes
Source: Royal Society of Chemistry journal article supplement (doi:10.1039/c4gc01664e), 2014-10-22
Supplement: c4gc01664e1.pdf [file c4gc01664e1.pdf]

## Supporting Information for

# Nanocrystalline Pt-CeO<sub>2</sub> as an efficient catalyst for room temperature selective reduction of nitroarenes

Astha Shukla,<sup>a</sup> Rajib Kumar Singha,<sup>a</sup> Takehiko Sasaki,<sup>b</sup> Rajaram Bal\*<sup>a</sup>

### Material:

Ce(NO<sub>3</sub>)<sub>3</sub>·6H<sub>2</sub>O, [Pt(NH<sub>3</sub>)<sub>4</sub>](NO<sub>3</sub>)<sub>2</sub>, PVP(Polyvinylpyrrolidone), Commercial CeO<sub>2</sub> were purchased from Sigma-Aldrich. While cetyltrimethylammoniumbromide (CTAB), Na<sub>2</sub>CO<sub>3</sub>, ethanol, hydrazine, etc. were purchased from Merck KGaA, Darmstadt, Germany. *p*-nitrophenol and other nitro compounds were purchased from Sigma Aldrich with 99.9% purity. Double distilled water was prepared with a BOROSIL® water distillation unit. All the chemicals were used without further purification.

### Catalyst characterization:

The surface morphology, particle size, and elementary composition of prepared catalyst was investigated by various characterization techniques such as by XRD, ICP-AES, XPS, SEM, TEM, EXAFS and BET-surface area measurements. Powder X-ray diffraction patterns were recorded on a Rigaku- Geigerflex X-ray diffractometer fitted with a Cu K $\alpha$  radiation as a source. Diffraction patterns in the 5°–80° region were recorded with a 0.04 step size (step time = 4 s). The surface area of the catalyst was analyzed by N<sub>2</sub> adsorption-desorption isotherms at –196°C (BelsorbMax, BEL, Japan). SEM images were taken on a FEI Quanta 200 F, using a tungsten filament doped with lanthanumhexaboride (LaB<sub>6</sub>) as an X-ray source, fitted with an ETD detector with high vacuum mode, using secondary electrons and an acceleration tension of 10 or 30 kV. Samples were analyzed by spreading them on a carbon tape. Energy dispersive X-ray spectroscopy (EDX) was used in connection with SEM for the elemental analysis. The elemental mapping was also collected with the same

spectrophotometer. TEM images were collected using a JEOL JEM 2100 microscope, and samples were prepared by mounting an ethanol-dispersed sample on a lacey carbon Formvar coated Cu grid. X-Ray photoelectron spectra (XPS) were recorded on a Thermo Scientific K-Alpha X-Ray photoelectron spectrometer and binding energies ( $\pm 0.1$  eV) were determined with respect to the position of the C 1s peak at 284.8 eV. EXAFS measurements of the Cu K-edge were carried out at the High Energy Accelerator Research Organization (KEK-IMMS-PF). The measurement was made in transition mode and spectra were taken at BL-7C and BL-9C. The electron storage ring was operated at 2.5 GeV and 450 mA, synchrotron radiation from the storage ring was monochromatized by a Si (111) channel cut crystal. The ionized chambers, which were used as detectors for the incident X-ray ( $I_0$ ) and transmitted X-ray ( $I$ ), were filled with  $N_2$  gas mixture, respectively. The angle of the monochromators was calibrated with Cu foil. The EXAFS raw data were analyzed with UWXAFS analysis package,<sup>1</sup> including background subtraction program AUTOBK<sup>2</sup> and curve fitting program FEFFIT.<sup>3</sup> The amplitude reducing factor,  $S_0^2$  was fixed at 1.0. The backscattering amplitude and phase shift were calculated theoretically by FEFF 8.4 code.<sup>4</sup> ATOMS<sup>5</sup> was used to obtain the FEFF input code for the crystalline materials. Inductively coupled Plasma Atomic Emission Spectroscopic (ICP-AES) analysis was carried out by Inductively Coupled Plasma Atomic Emission Spectrometer; model: PS 3000 uv, (DRE), Leeman Labs, Inc, (USA).

### **Catalytic hydrogenation of *p*-nitrophenol and their nitro derivatives:**

Chemoselective reduction experiments were conducted in a batch mode, in a 25ml stainless steel autoclave (Parr reactor, USA) at 25°C. The reactor was equipped with a magnetically driven stirrer, a dip tube and a water cooling system. In a typical experiment, 0.050g catalyst was added to 1gm substrate, dissolved in 10ml solvent contains ethanol and distilled water (2:1mole ratio). Then the system was purged with  $H_2$  four times to remove the air and the system was pressurized with 1.5MPa  $H_2$  with 800 rpm stirring speed. Aliquots (liquid and gas) were withdrawn through the special sample port attached within the reactor. At the end of the reaction, the reaction pressure was released very slowly. The catalyst particles were separated by filtration and the product was identified by GC-MS and was analyzed by Gas Chromatography (Agilent 7890) having HP-5 (length 30m, id.0.28mm,0.25 $\mu$ m film thickness) column equipped with flame ionization detector. Conversion was calculated by

[moles of reactant reacted] / [initial moles of reactant used] x 100 and selectivity of products was calculated by [total moles of product formed]/[total moles of reactant converted] x100 by drawing a calibration curve using authentic samples. At the end of the reaction, solid catalyst was isolated by means of filtration and washed with acetone, dried at ambient temperature for the further use.

1. E. A. Stern, M. Newvill, B. Ravel, Y. Yacoby and D. Haskel, *Phys. B*, 1995, **117**, 208.
2. M. Newvill, P. Livins, Y. Yacoby, E. A. Stern and J. Rehr, *J. Phys. Rev. B: Condens. Matter*, 1993, **47**, 14126.
3. A. L. Ankudinov, B. Ravel, J. J. Rehr and S. D. Conradson, *Phys. Rev. B: Condens. Matter*, 1998, **58**, 7565.
4. A. L. Ankudinov, A. I. Nesvizhskii and J. Rehr, *J. Phys. Rev. B: Condens. Matter*, 2003, **67**, 115120.
5. R. Ravel, *J. Synchrotron Radiat.*, 2001, **8**, 314.

Figure S1

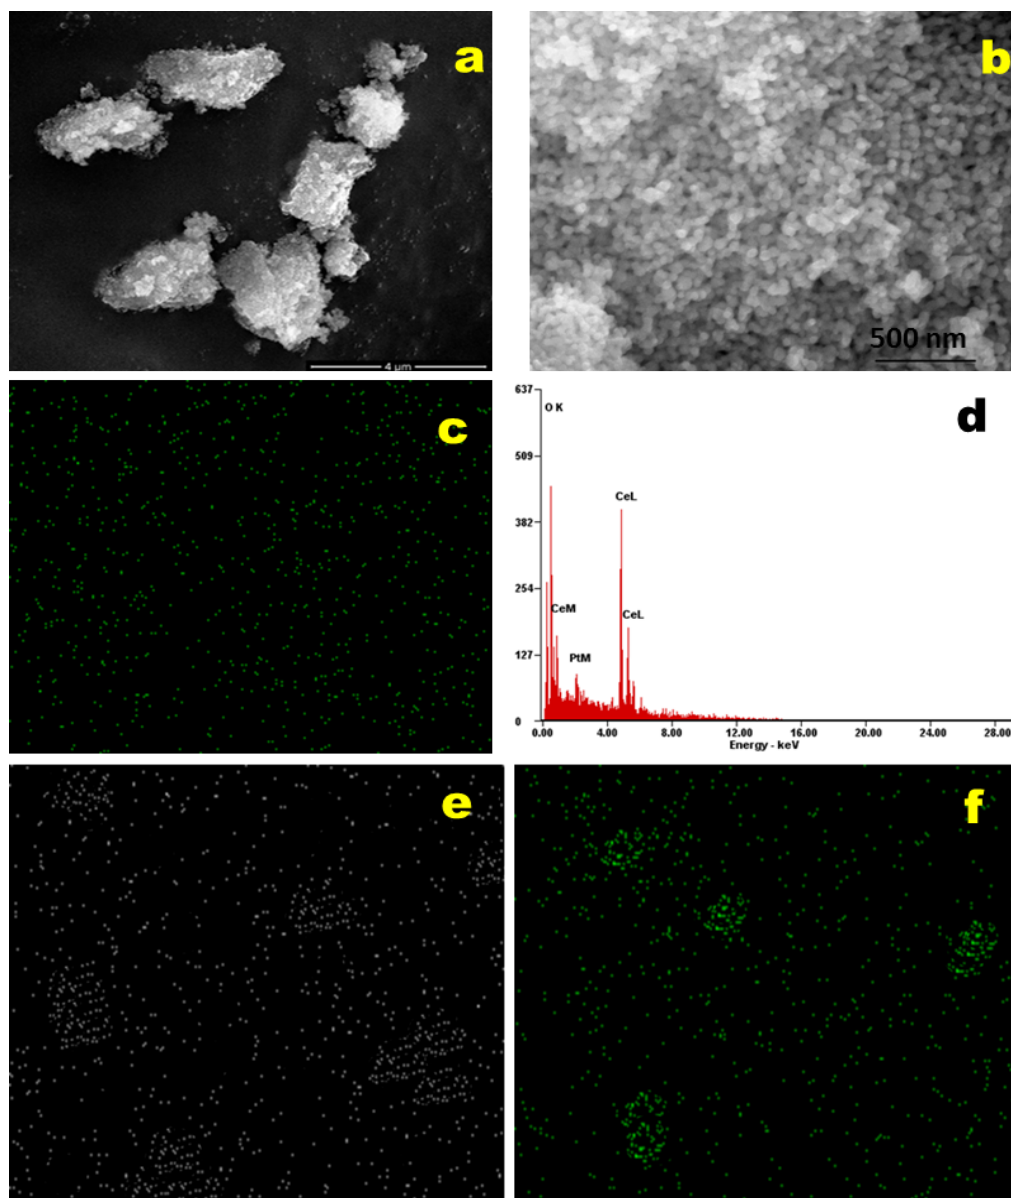

**Fig.S1** SEM image of (a) commercial Pt-CeO<sub>2</sub>, (b) 0.9% Pt-CeO<sub>2</sub> (c) Elemental mapping of Pt of prepared 0.9% Pt-CeO<sub>2</sub> (d) EDX pattern of 0.9%Pt-CeO<sub>2</sub> catalyst, (e) Elemental mapping of Pt of 1%Pt-CeO<sub>2</sub><sup>Imp</sup> and (f) Elemental mapping of Pt of 1%Pt-CeO<sub>2</sub><sup>CoPre</sup>.

Figure S2

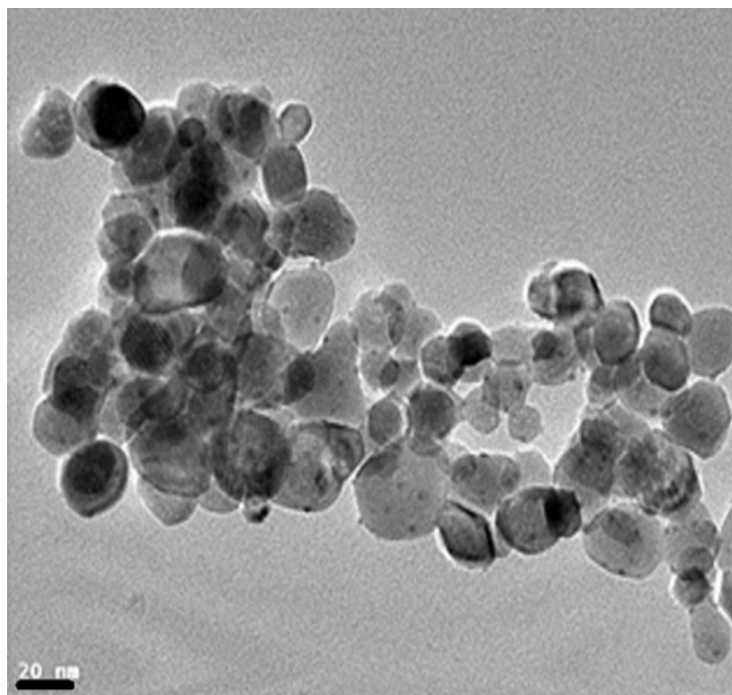

Fig. S2 TEM image of spent catalyst after 5 reuses.

Figure S3

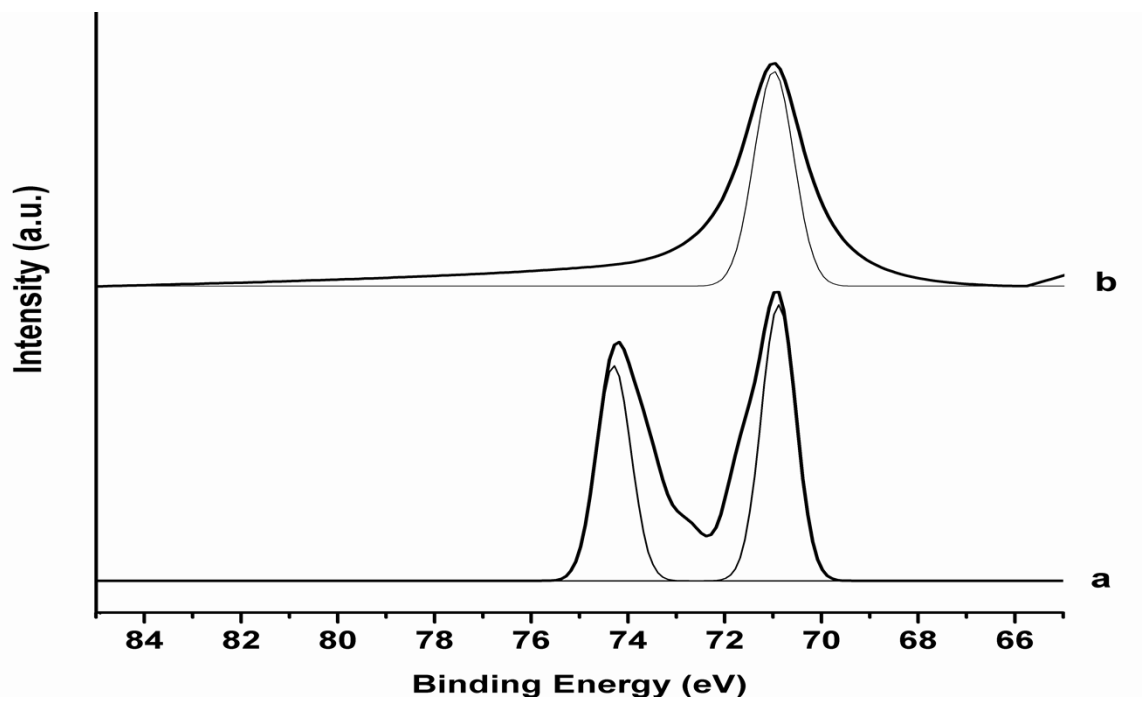

Fig. S3 XPS pattern of Pt4f core levels of 0.9%Pt-CeO<sub>2</sub> catalyst a) fresh catalyst b) spent catalyst.

Figure S4

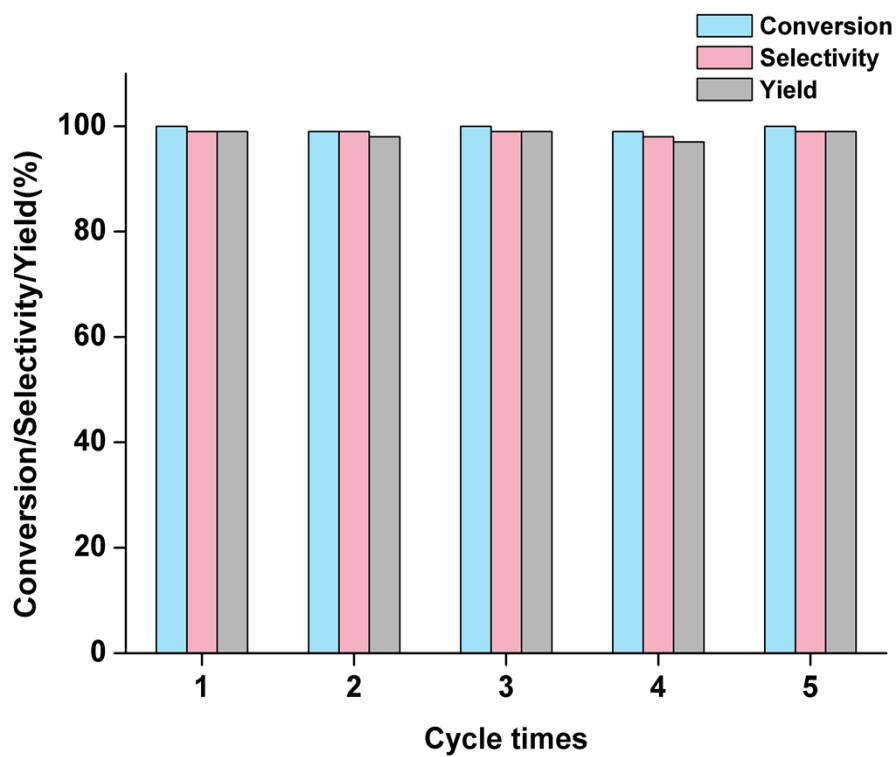

Fig. S4 Recyclability tests of chemoselective reduction of *p*-nitrophenol to *p*-aminophenol.

Figure S5 EXAFS spectra

(a) Fresh catalyst

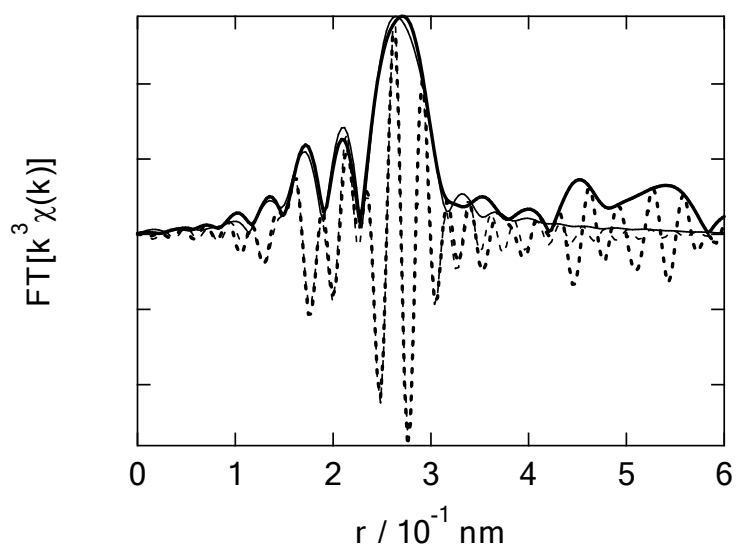

(b) Spent catalyst

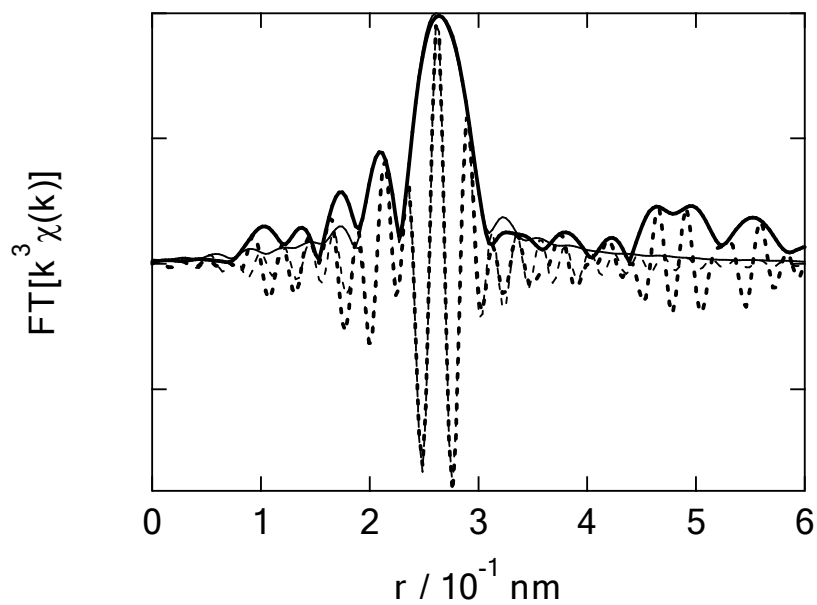

Table1 Activities of different catalyst on *p*-nitrophenol hydrogenation to *p*-aminophenol.

| Entry | Catalyst                             | Catalyst loading (wt%) | Time (h) | C <sub>PNP</sub> (%) | Selectivity(%) |        | Y <sub>PAP</sub> (%) |
|-------|--------------------------------------|------------------------|----------|----------------------|----------------|--------|----------------------|
|       |                                      |                        |          |                      | PAP            | Others |                      |
| 1     | CeO <sub>2</sub> <sup>Com.</sup>     | -                      | 6        | -                    | -              | -      | -                    |
| 2     | PtCeO <sub>2</sub> <sup>Imp.</sup>   | 1                      | 6        | -                    | -              | -      | -                    |
| 3     | PtCeO <sub>2</sub> <sup>CoPre.</sup> | 1                      | 6        | -                    | -              | -      | -                    |
| 4     | Pt-ZnO                               | 1                      | 6        | 12                   | 75             | 25     | 9                    |
| 5     | Pt-TiO <sub>2</sub>                  | 1                      | 6        | 15                   | 82             | 18     | 12.3                 |
| 6     | Pt-CeO <sub>2</sub> <sup>NCo.</sup>  | 1                      | 6        | 45                   | 95             | 5      | 42.8                 |
| 7     | Pt-CeO <sub>2</sub>                  | 0.5                    | 6        | 50                   | 99             | 1      | 49.5                 |

|    |                                     |     |   |     |    |    |      |
|----|-------------------------------------|-----|---|-----|----|----|------|
| 8  | Pt- CeO <sub>2</sub>                | 0.9 | 6 | 100 | 99 | 1  | 99   |
| 9  | Pt- CeO <sub>2</sub>                | 1.9 | 6 | 95  | 90 | 10 | 85.5 |
| 10 | Pt-CeO <sub>2</sub>                 | 2.8 | 6 | 90  | 85 | 15 | 76.5 |
| 11 | Pt- CeO <sub>2</sub> <sup>NSP</sup> | 0.9 | 5 | 100 | 99 | 1  | 99   |
| 12 | Pt- CeO <sub>2</sub> <sup>HAP</sup> | 0.9 | 3 | 100 | 99 | 1  | 99   |
| 13 | PtCeO <sub>2</sub> <sup>r</sup>     | 0.9 | 6 | 100 | 99 | 1  | 99   |
| 14 | PtCeO <sub>2</sub> <sup>d</sup>     | 1   | 6 | -   | -  | -  | -    |

Reaction conditions: Substrate (*p*-nitrophenol) = 1gm; solvent (ethanol+ water) = 2:1; 25°C; time = 6h ; H<sub>2</sub> = 1.5MPa; Catalyst used is 5wt %, C<sub>PNP</sub>(%):conversion of PNP based on FID – GC result = moles of PNP reacted/initial moles of PNP used] × 100; S(%): selectivity of product calculated by total moles of product formed/total moles of PAP converted ×100; Y<sub>PAP</sub>: yield of PAP= conversion × selectivity/100; Com. = commercial; Imp.=impregnation method on comm. CeO<sub>2</sub> powder; NCo. = nanoparticles by post synthesis over commercial CeO<sub>2</sub>; CoPre. = co-precipitation method; NSP = 4-nitrosophenol; HAP = 4-(hydroxyamino) phenol; <sup>d</sup> Pt loading on CeO<sub>2</sub> support prepared by different method; PAP:*p*-aminophenol; Others: nitroso or hydroxyamino phenol; <sup>r</sup> Catalyst after 5 reuses.

Table 2 Reactivities of the nitro- compounds over 0.9%Pt-CeO<sub>2</sub>.

| Entry | Substrate                     | Product                       | C <sub>R</sub> . (%) | Selectivity(%) |        | Y <sub>P</sub> (%) |
|-------|-------------------------------|-------------------------------|----------------------|----------------|--------|--------------------|
|       |                               |                               |                      | S <sub>a</sub> | Others |                    |
| 1     | Nitrobenzene                  | Aniline                       | 100                  | 98             | 2      | 98                 |
| 2     | <i>p</i> -Nitro phenol        | <i>p</i> -Amino phenol        | 100                  | 99             | 1      | 99                 |
| 3     | <i>p</i> -Nitro benzaldehyde  | <i>p</i> -Amino benzaldehyde  | 100                  | 99             | 1      | 99                 |
| 4     | <i>p</i> -Nitro benzoic acid  | <i>p</i> -Amino benzoic acid  | 100                  | 99             | 1      | 99                 |
| 5     | <i>m</i> -Chloro nitrobenzene | <i>m</i> -Chloro aminobenzene | 100                  | 99             | 1      | 99                 |
| 6     | <i>p</i> -Dinitro benzene     | <i>p</i> -Diamino benzene     | 100                  | 98             | 2      | 98                 |



|   |                                  |                                  |     |    |   |    |
|---|----------------------------------|----------------------------------|-----|----|---|----|
| 7 | <i>p</i> -Nitro toluene          | <i>p</i> -Amino toluene          | 100 | 98 | 2 | 98 |
| 8 | 3-Methoxy nitrobenzene           | 3-Methoxy aminobenzene           | 100 | 98 | 2 | 98 |
| 9 | 4-Hydroxy-3-methoxy nitrobenzene | 4-Hydroxy-3-methoxy aminobenzene | 100 | 97 | 3 | 97 |

Reaction conditions: Substrates = 1gm; solvent (ethanol + water) = 2:1; catalyst used is 5wt % (0.9%Pt CeO<sub>2</sub>); 25°C; time = 6h; H<sub>2</sub> = 1.5MPa; C<sub>R</sub>(%): Conversion of reactant; S<sub>a</sub>: Selectivity of aminocompounds; Others: nitroso or hydroxyamino compounds; Y<sub>P</sub>(%):Yield of product.

Table 3 Comparative table of different reported catalysts (using hazardous chemicals, high temperature, organic solvents etc.)

| Entry | Catalysts                                                                      | Solvent /Temp.       | Hydrogen source                                 | Yield (%) | References                                                                                               |
|-------|--------------------------------------------------------------------------------|----------------------|-------------------------------------------------|-----------|----------------------------------------------------------------------------------------------------------|
| 1     | Au-Al <sub>2</sub> O <sub>3</sub> (Al <sub>2</sub> O <sub>3</sub> -BT- AuNPs ) | H <sub>2</sub> O, RT | NaBH <sub>4</sub>                               | 95.1      | Xin Huang, Xuepin Liao, and Bi Shi, <i>Green Chem.</i> , 2011, 13, 2801–2805                             |
| 2     | SS-Pt (solid supported platinum(0))                                            | PEG400 / 60°C        | N <sub>2</sub> H <sub>4</sub> .H <sub>2</sub> O | 92        | Arun K. Shila, and Pralay Das, <i>Green Chem.</i> , 2013, 15, 3421–3428                                  |
| 3     | Pt–Au/TiO <sub>2</sub>                                                         | EtOH / 60°C          | H <sub>2</sub>                                  | 100       | Daiping He, Xiangdong Jiao, Ping Jiang, Jian Wang and Bo-Qing Xu, <i>Green Chem.</i> , 2012, 14, 111–116 |
| 4     | Au/ZrO <sub>2</sub>                                                            | EtOH /150°C          | H <sub>2</sub>                                  | 99.4      | Daiping He, Hui Shi, Yu Wu and Bo-Qing Xu, <i>Green Chem.</i> , 2007, 9, 849-851.                        |

|    |                                                                                                                            |                                        |                                                    |       |                                                                                                                                                                                                                            |
|----|----------------------------------------------------------------------------------------------------------------------------|----------------------------------------|----------------------------------------------------|-------|----------------------------------------------------------------------------------------------------------------------------------------------------------------------------------------------------------------------------|
| 5  | Zn-Pc Zinc<br>(phthalocyanine with<br>PEG-400)                                                                             | PEG40<br>0/<br>100°C                   | N <sub>2</sub> H <sub>4</sub> .H <sub>2</sub><br>O | 99    | Upendra Sharma, Neeraj<br>Kumar, Praveen Kumar<br>Verma, Vishal Kumar and<br>Bikram Singh, <i>Green Chem.</i> ,<br>2012, 14, 2289–2293                                                                                     |
| 6  | Au-MgO                                                                                                                     | H <sub>2</sub> O /<br>RT               | NaBH <sub>4</sub>                                  | 55-99 | Keya Layek, M. Lakshmi<br>Kantam, Masayuki Shirai,<br>Daisuke Nishio-Hamane,<br>Takehiko Sasaki and H.<br>Maheswaran, <i>Green Chem.</i> ,<br>2012, 14, 3164–3174                                                          |
| 7  | Au-SiO <sub>2</sub>                                                                                                        | EtOH/<br>140°C                         | NaBH <sub>4</sub>                                  | 95-98 | Y. Y. Chen, J. S. Qiu, X. K.<br>Wang and J. H. Xiu, <i>J.<br/>Catal.</i> , 2006, 242, 227.                                                                                                                                 |
| 8  | Au/Fe(OH) <sub>x</sub>                                                                                                     | EtOH/<br>90°C                          | H <sub>2</sub>                                     | nd    | Lequan Liu, Botao Qiao,<br>Yubo Ma, Juan Zhang and<br>Youquan Deng, <i>Dalton<br/>Trans.</i> , 2008, 2542–2548                                                                                                             |
| 9  | Pt/Cu, Pd/Cu, Pd/Au,<br>Pt/Au, and Au/Cu<br>DENs (bimetallic Nps<br>using dendrimer-<br>encapsulation<br>synthesis route). | H <sub>2</sub> O/<br>/H <sub>2</sub> O | NaBH <sub>4</sub>                                  | 92-99 | Zachary D. Pozun, Stacia<br>E. Rodenbusch, Emily Keller,<br>Kelly Tran, Wenjie Tang,<br>Keith J. Stevenson, and<br>Graeme Henkelman <i>J. Phys.<br/>Chem. C</i> , 2013, 117,<br>7598–7604.                                 |
| 10 | Au-TiO <sub>2</sub>                                                                                                        | EtOH<br>/H <sub>2</sub> O              | NaBH <sub>4</sub>                                  | 90-96 | Ioannis Tamiolakis, Stella<br>Fountoulaki, Nikolaos<br>Vordos, Ioannis N. Lykakis<br>and Gerasimos S. Armatas, <i>J.<br/>Mater. Chem. A</i> , 2013, 1,<br>14311–14319                                                      |
| 11 | Au/TiO <sub>2</sub>                                                                                                        | THF/<br>140°C                          | H <sub>2</sub>                                     | nd    | A. Corma and P. Serna,<br><i>Science</i> , 2006, 313, 332.                                                                                                                                                                 |
| 12 | Au-α-Fe <sub>2</sub> O <sub>3</sub>                                                                                        | H <sub>2</sub> O /<br>RT               | NaBH <sub>4</sub>                                  | 100   | Shao-Wen Cao, Jun Fang,<br>Mohammad Mehdi<br>Shahjamali, Zheng Wang,<br>Zhen Yin, Yanhui Yang,<br>Freddy Y. C. Boey, James<br>Barber, Say Chye Joachim<br>Loo and Can Xue,<br><i>CrystEngComm</i> , 2012, 14,<br>7229–7235 |

|    |                                                              |                           |                                                 |      |                                                                                                                                                                     |
|----|--------------------------------------------------------------|---------------------------|-------------------------------------------------|------|---------------------------------------------------------------------------------------------------------------------------------------------------------------------|
| 13 | $\gamma$ -Fe <sub>2</sub> O <sub>3</sub> -polymer composites | EtOH / 85°C               | N <sub>2</sub> H <sub>4</sub> .H <sub>2</sub> O | 74.7 | Xianmo Gu, Zhenhua Sun, Shuchang Wu, Wei Qi, Haihua Wang, Xianzhu Xu and Dangsheng Su <i>Chem. Commun.</i> , 2013, 49, 10088—10090.                                 |
| 14 | NiPd-colloid                                                 | THF / 80-100°C            | H <sub>2</sub>                                  | 99   | Robert Raja, Vladimir B. Golovko, John M. Thomas, Angel Berenguer-Murcia, Wuzong Zhou, Songhai Xie and Brian F. G. Johnson, <i>Chem. Commun.</i> , 2005, 2026–2028. |
| 15 | Pt-CeO <sub>2</sub>                                          | EtOH-H <sub>2</sub> O/ RT | H <sub>2</sub>                                  | 98   | This work                                                                                                                                                           |
